# Supplementary material for: Effective buoyancy ratio: a new parameter for characterizing thermo-chemical mixing in the Earth's mantle
Source: Copernicus journal article supplement (doi:10.5194/se-6-93-2015), 2015-01-28
Supplement: Supplementary file 1 [file se-6-93-2015-supplement.zip]

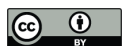

## *Supplement of*

# **Effective buoyancy ratio: a new parameter for characterizing thermo-chemical mixing in the Earth's mantle**

**A. Galsa et al.**

*Correspondence to:* A. Galsa (gali@pangea.elte.hu)

- se-6-93-2015-supplement-cover-letter.pdf
- Fig\_S1.png
- Fig\_S2.png
- Fig\_S3.png
- Fig\_S4.png
- Supplementary.docx
- Supplementary.pdf
